# Supplementary material
Source: PubMed Central journal article supplement (PMC6338517)

**Table S1. Insulated neighborhoods for Each Gene. Related to Figures 1 and S1.**

**Table S2. 4C Primers. Related to STAR Methods.**

**Table S3. Previously Published Datasets Used in this Study. Related to STAR Methods.**

**Figure S1. Meta-insulated-neighborhood analysis for inactive genes. Related to Figure 1.**

Heatmaps showing Smc1, CTCF, TAF2 (TFIID), H3K27ac, Pol II, Med26 (Mediator), H3K27me3 binding and distribution of promoter capture Hi-C interactions (Capture Hi-C) in insulated-neighborhoods of 5,478 inactive genes (Nascent RNA-seq RPKM <0.5). For ChIP-seq, values of  $-\log_{10}P$  at significantly enriched windows were used. For Capture Hi-C, values indicating the interaction frequencies ( $\log_2$  ratio of observed over expected number of contacts) were used; these values were obtained directly from the original study cited in the text. These genes are classified as Poised genes and Silent genes based on H3K27me3 binding at their promoters.

**Figure S2. Esrrb KD by siRNA and its effects on gene expression and Mediator binding. Related to Figure 3.**

(A) Esrrb immunoblot of negative control (siCtrl) versus siRNA knockdown (siEsrrb) normalized via  $\beta$ -Actin levels. The numbers indicate the intensity of signal in siEsrrb normalized to 1 for siCtrl; representative blots are shown.

(B) Browser tracks showing mRNA levels of *Esrrb* and *Actb* ( $\beta$ -Actin) in siCtrl versus siEsrrb. Y axes are normalized read counts.

(C) Relative *Esrrb* and *Actb* mRNA levels in siEsrrb normalized to 1 for siCtrl. Results of two biological replicates are shown.

(D) Venn diagrams showing the proportional overlap of genes down-regulated (Cutoff, 3 fold for the upper, 2 fold for the lower) upon Esrrb KD and Klf4 KD.

(E) Pie-charts showing percentages (numbers in the charts) of enhancers overlapping Esrrb-Med1 co-binding loci of differentially down-regulated genes. FC, fold change (siCtrl/siEsrrb) as in Figure 3F.

(F) Boxplot comparing Esrrb KD effects on decreased Med1 (Mediator) binding in super-enhancers (SEs) and typical enhancers (TEs). Y axis is  $\log_2$  ratio of normalized Med1 ChIP-seq counts in Esrrb KD versus negative control. No significant difference between SE and TE ( $p$ -value = 0.15, Wilcoxon Rank-sum test).

(G) Boxplot comparing Esrrb KD effects on downregulation of SE-related and TE-related genes. Y axis is  $\log_2$  ratio of Nascent RNA-seq RPKM (Esrrb KD versus

negative control). No significant difference between SE-related and TE-related genes (p-value = 0.74, Wilcoxon Rank-sum test).

**Figure S3. Different types of insulated neighborhoods constrain gene regulation. Related to Figure 4.**

(A) Schematic of the major 3 types of insulated neighborhoods observed in our study. Type i, single gene down-regulated by *Esrrb* KD in an insulated neighborhood; Type ii, an insulated neighborhood bearing multiple affected genes; Type iii, an insulated neighborhood bearing active genes where one or more are affected but one or more are not.

(B) Browser plots and bar graph showing a Type i insulated neighborhood. Legends as in Figure 4B.

(C) Browser plots and bar graph showing a Type iii insulated neighborhood.

(D) Browser plots and bar graph showing another Type iii insulated neighborhood.

**Figure S4. Depletion of Mediator causes loss of enhancer-promoter interactions. Related to Figure 5.**

(A-C) View of genomic regions around *Cdyl2*, *Klf4* and *Tbx3* insulated neighborhoods. *Smc1* ChIA-PET data and binding of Rad21, CTCF, Med1 and H3K27ac are shown. DNaseI hypersensitivity is also shown in (C). Grey bar and VP/Pro, promoter; green bar and Enh, enhancer.

(D) Relative mRNA levels of *Cdyl2*, *Klf4*, *Tbx3* and *Sik1* in si*Esrrb* normalized to 1 for siCtrl. Results of two biological replicates are shown.

(E) Broader view of *Sik1* 4C data comparing control and *Esrrb* KD samples. Gray bar and VP/Pro, promoter; green bar and Enh, enhancer; red bar and Bdr, boundary. P values (Student's t test) for boundaries and enhancer are shown.

(F) Boxplot showing DNase I hypersensitivity at active and inactive promoters. Raw counts were used.

**Figure S5. Depletion of Mediator causes loss of PIC assembly. Related to Figure 6.**

(A) Immunoblots of Mock and Mediator depleted nuclear extracts showing specific depletion of Mediator subunits.

(B) Bar graphs of mRNA levels of Group A and Group B genes in siCtrl and si*Esrrb*-treated cells from Figure 6C.

**Table S1. Insulated neighborhoods for Each Gene. Related to Figures 1 and S1. (See attached Excel file)**

**Table S2. 4C Primers. Related to STAR Methods.**

| View point     | 1 <sup>st</sup> RE* | 2 <sup>nd</sup> RE** | Reading primer                                                                                                     | Non-reading primer                                                |
|----------------|---------------------|----------------------|--------------------------------------------------------------------------------------------------------------------|-------------------------------------------------------------------|
| Mitf_promoter  | DpnII               | NlaIII               | 5'-<br>AATGATACGGCGACCACCGAGATCT<br>ACACTCTTTCCCTACACGACGCTCTT<br>CCGATCT <u>NN</u> ACCGGACAGGGACTGT<br>GATC-3'*** | 5'-<br>CAAGCAGAAGACGGCATA<br>CGAGACTGACTGTTCTCC<br>TCCCAGG-3'     |
| Sik1_promoter  | DpnII               | NlaIII               | 5'-<br>AATGATACGGCGACCACCGAGATCT<br>ACACTCTTTCCCTACACGACGCTCTT<br>CCGATCT <u>NN</u> CACTGAGGGAACCTGG<br>GATC-3'    | 5'-<br>CAAGCAGAAGACGGCATA<br>CGATCGGCTGCTAGCTCT<br>GCTC-3'        |
| Cdyl2_promoter | DpnII               | NlaIII               | 5'-<br>AATGATACGGCGACCACCGAGATCT<br>ACACTCTTTCCCTACACGACGCTCTT<br>CCGATCT <u>NN</u> GTGGGTTGGGTGGGT<br>GATC-3'     | 5'-<br>CAAGCAGAAGACGGCATA<br>CGACTTCTCCGTACCTCG<br>TAAAGGTC-3'    |
| Klf4_promoter  | DpnII               | NlaIII               | 5'-<br>AATGATACGGCGACCACCGAGATCT<br>ACACTCTTTCCCTACACGACGCTCTT<br>CCGATCT <u>NN</u> TTGAATCAAAGAAGA<br>AGGATC-3'   | 5'-<br>CAAGCAGAAGACGGCATA<br>CGAGCCGCCAGGTGAGA<br>ATG-3'          |
| Tbx3_promoter  | NlaIII              | CviQI                | 5'-<br>AATGATACGGCGACCACCGAGATCT<br>ACACTCTTTCCCTACACGACGCTCTT<br>CCGATCT <u>NN</u> TGGCTGGGCGGTTCCA<br>TG-3'      | 5'-<br>CAAGCAGAAGACGGCATA<br>CGAGCAGGTTCAAACCTAG<br>CAGCTATTGG-3' |

\*1<sup>st</sup> RE, primary restriction enzyme; \*\*2<sup>nd</sup> RE, secondary restriction enzyme; \*\*\*NN, barcode.

**Table S3. Previously Published Datasets Used in this Study. Related to STAR Methods.**

| <b>Dataset</b>                         | <b>Data Access</b>     | <b>Source</b>             |
|----------------------------------------|------------------------|---------------------------|
| Promoter Capture Hi-C                  | E-MTAB-2414            | Schoenfelder et al., 2015 |
| Smc1 ChIA-PET                          | GSM1397342, GSM1480237 | Downen et al., 2014       |
| Smc3 ChIP-seq                          | GSM560344, GSM560343   | Kagey et al., 2010        |
| ChIP-seq input of Kagey et al., 2010   | GSM560357              | Kagey et al., 2010        |
| Rad21 ChIP-seq                         | GSM2418859             | Hansen et al., 2016       |
| CTCF ChIP-seq                          | GSM2418860             | Hansen et al., 2016       |
| ChIP-seq input of Hansen et al., 2010  | GSM2418857             | Hansen et al., 2016       |
| H3K27ac ChIP-seq                       | GSM2417096             | Chronis et al., 2017      |
| ChIP-seq input of Chronis et al., 2010 | GSM2417127             | Chronis et al., 2017      |
| DNase I HS                             | GSM1014154             | ENCODE Project            |

Fig S1 (related to Fig 1)

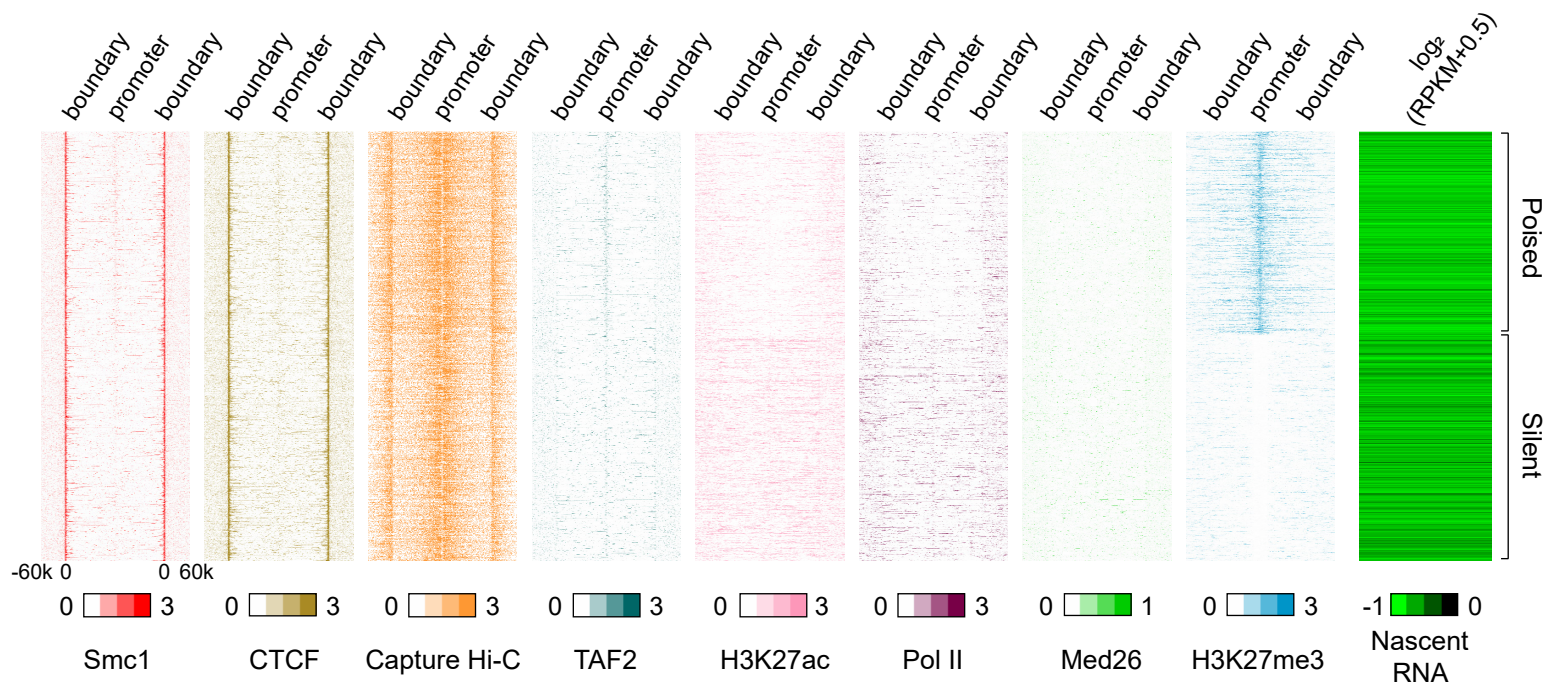

A

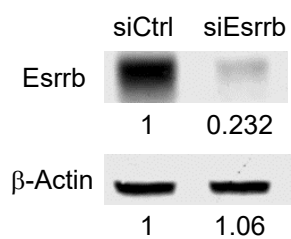

B

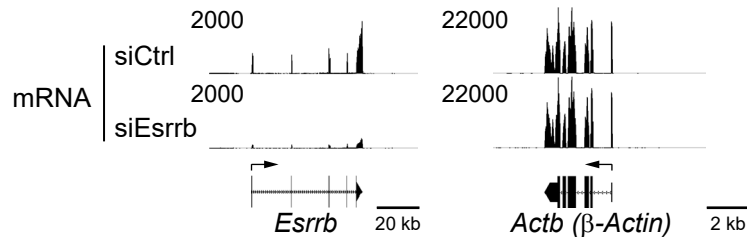

C

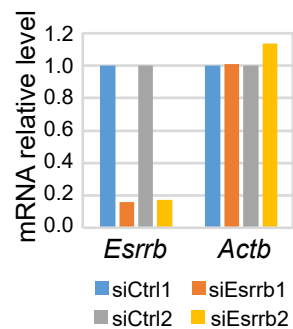

D

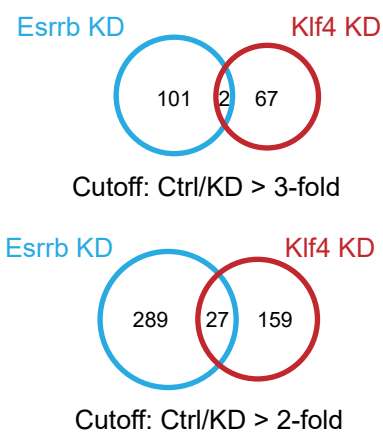

F

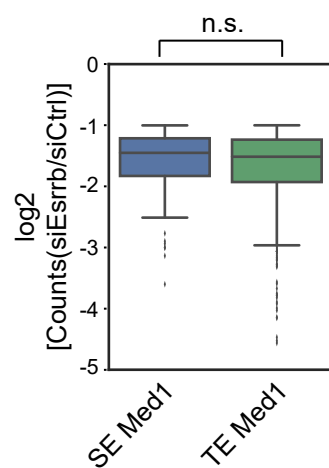

G

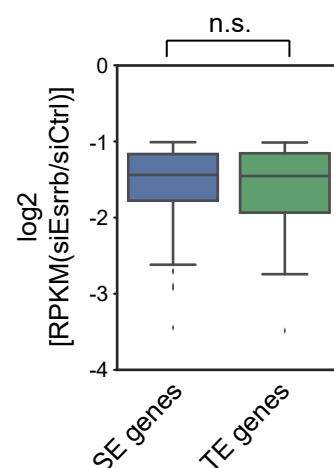

E

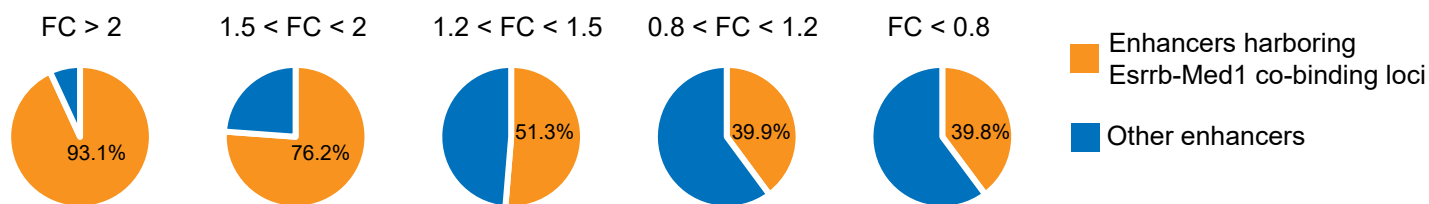

A

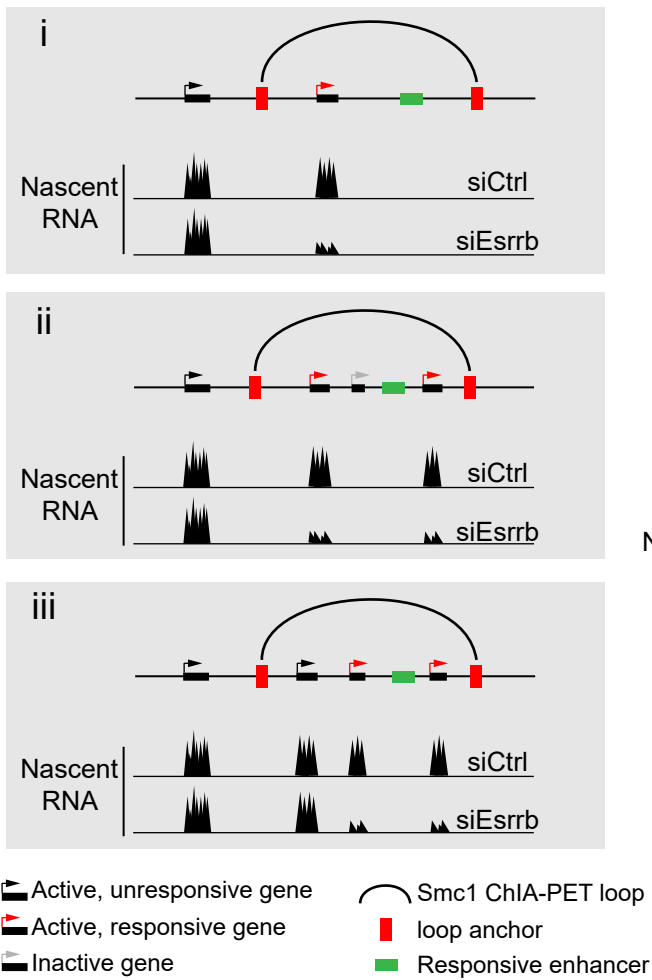

B

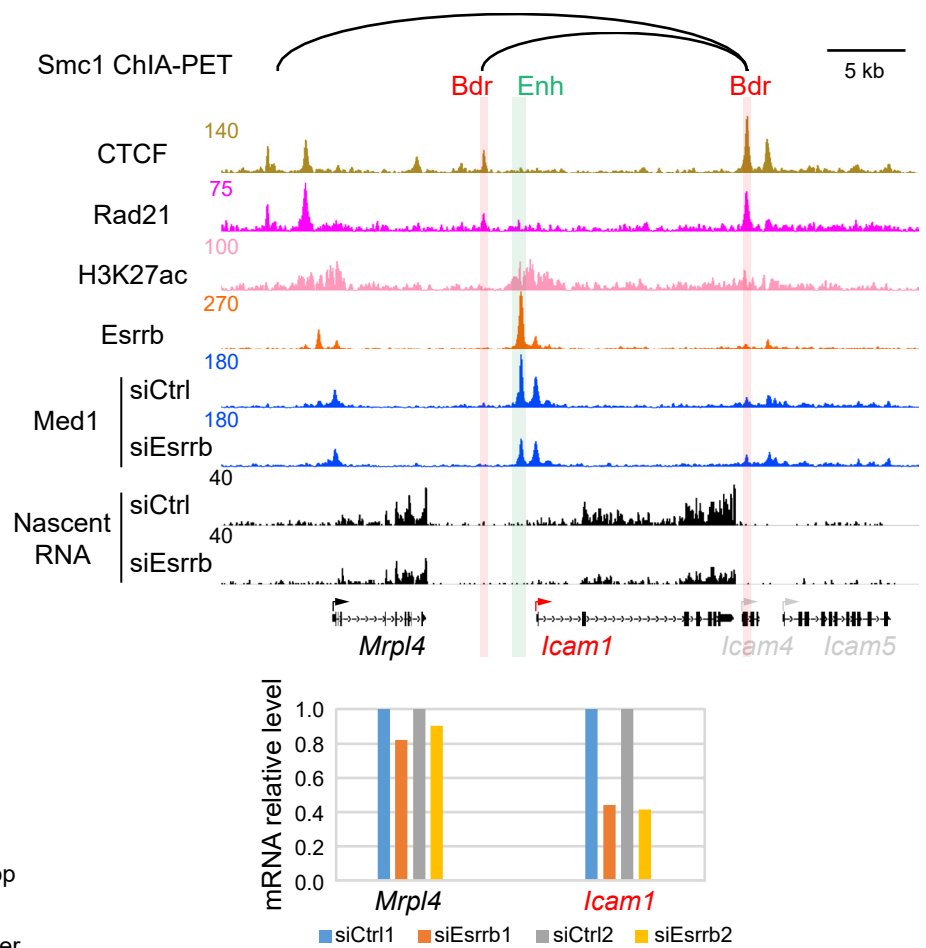

C

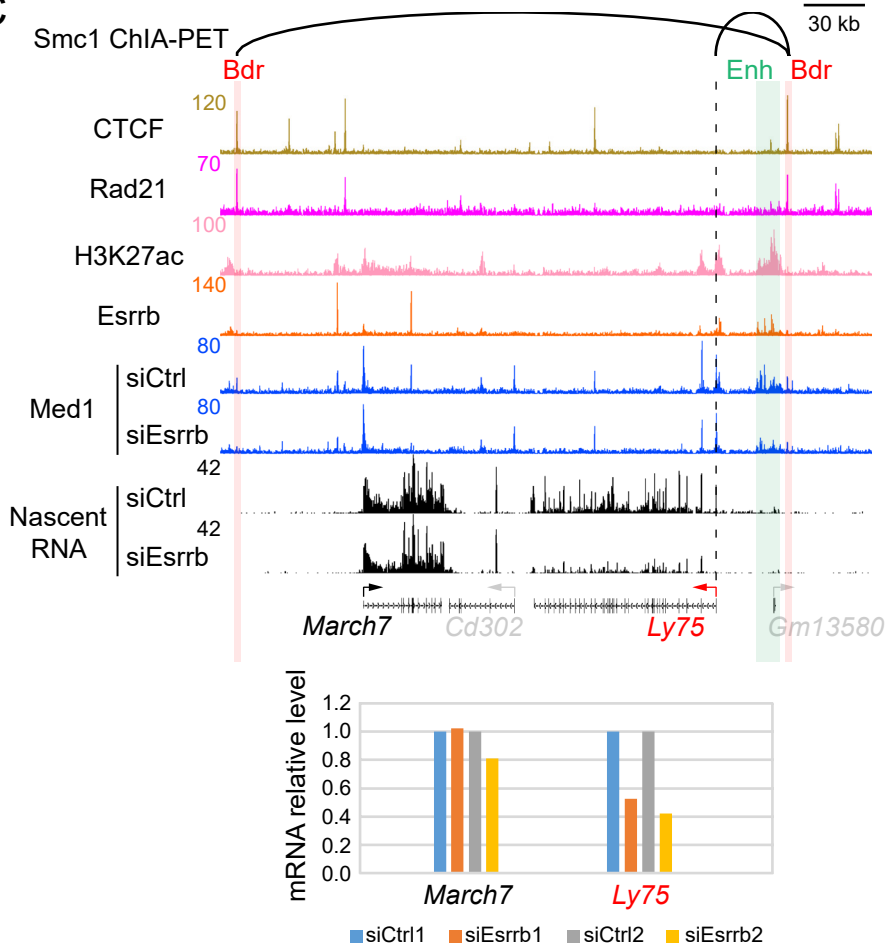

D

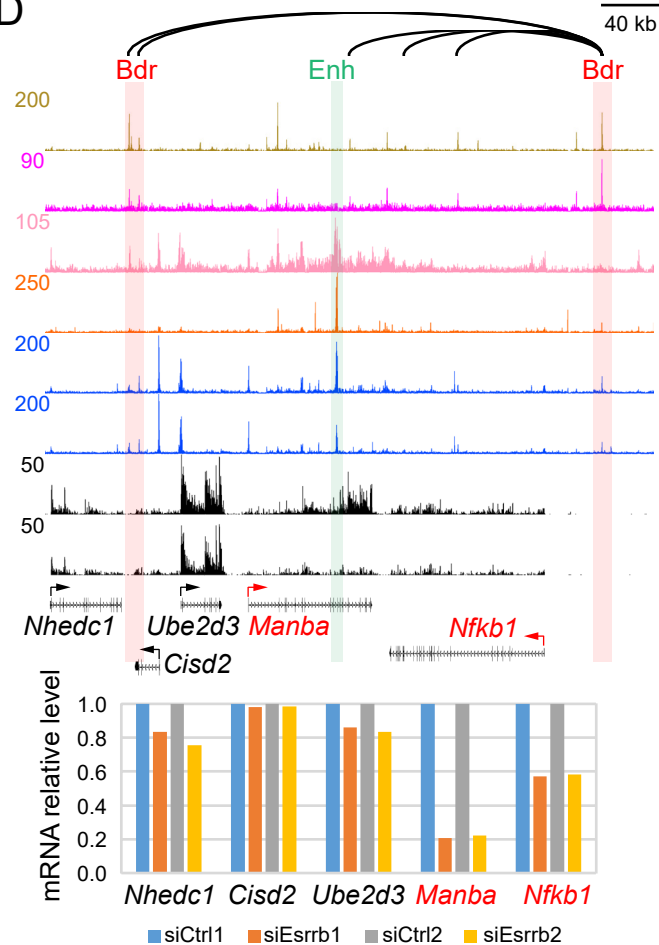

A

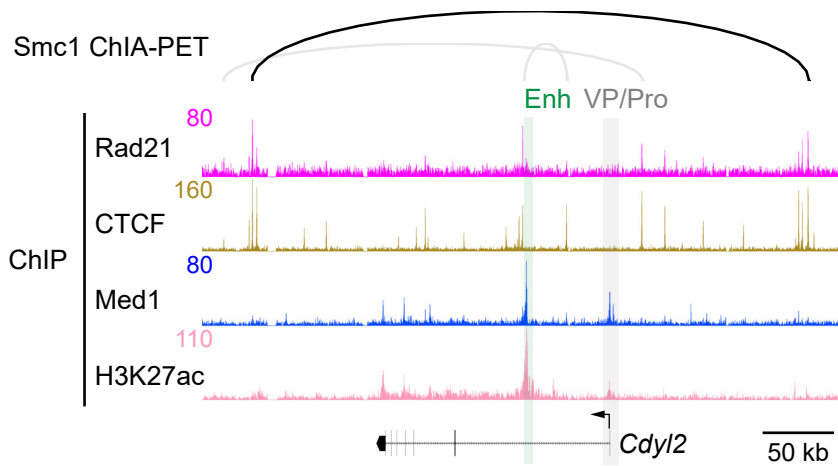

B

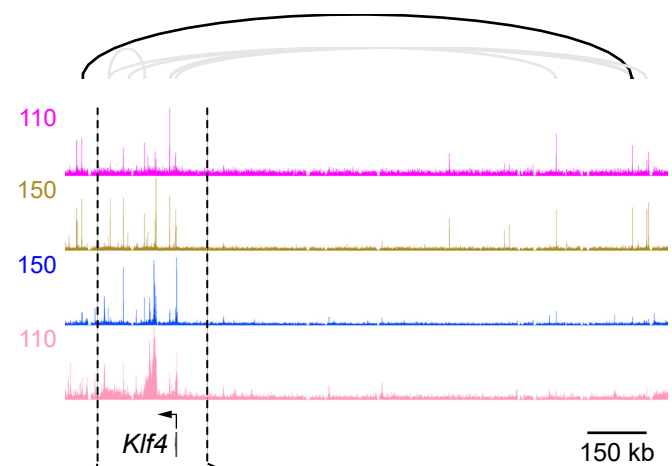

C

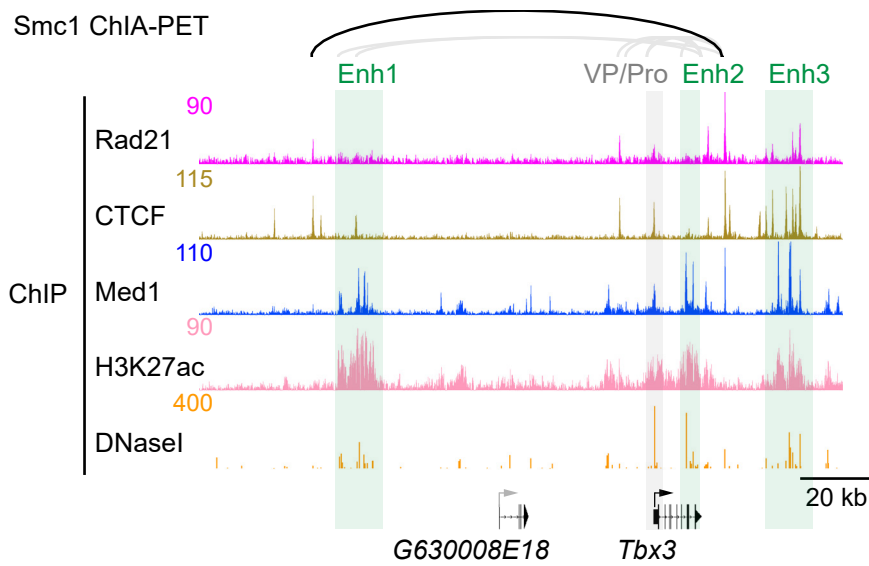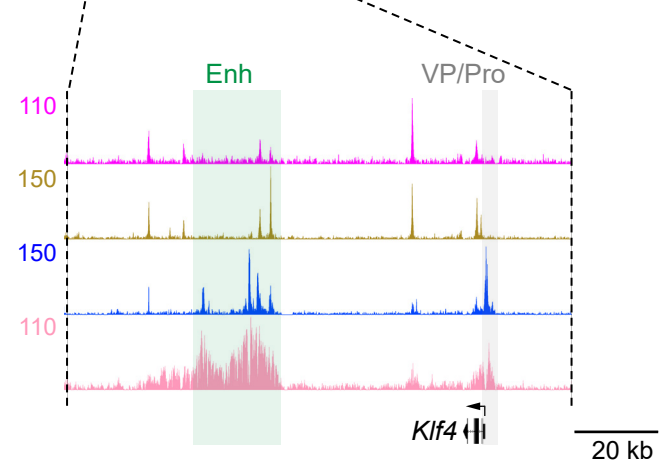

D

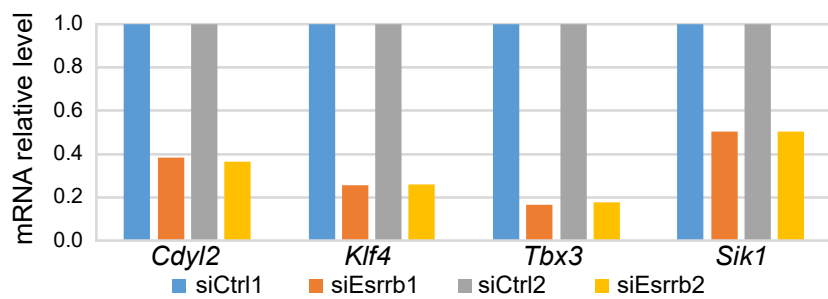

E

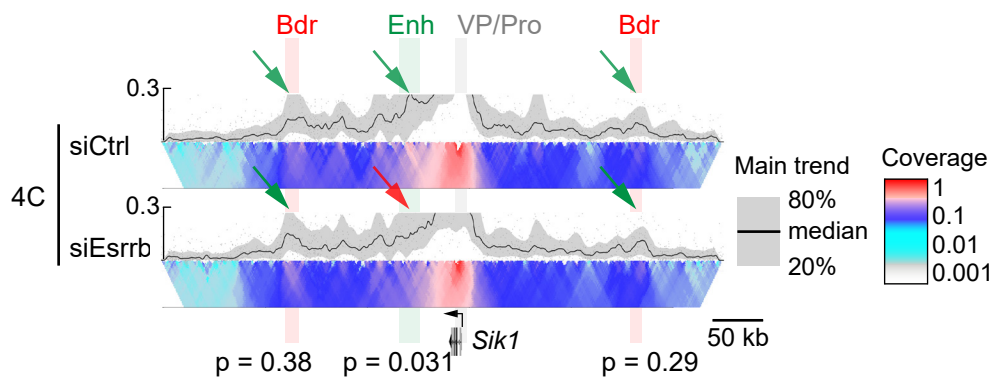

F

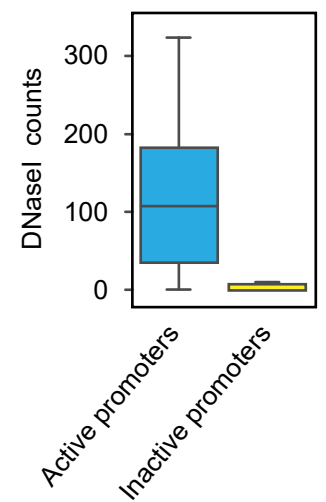



A

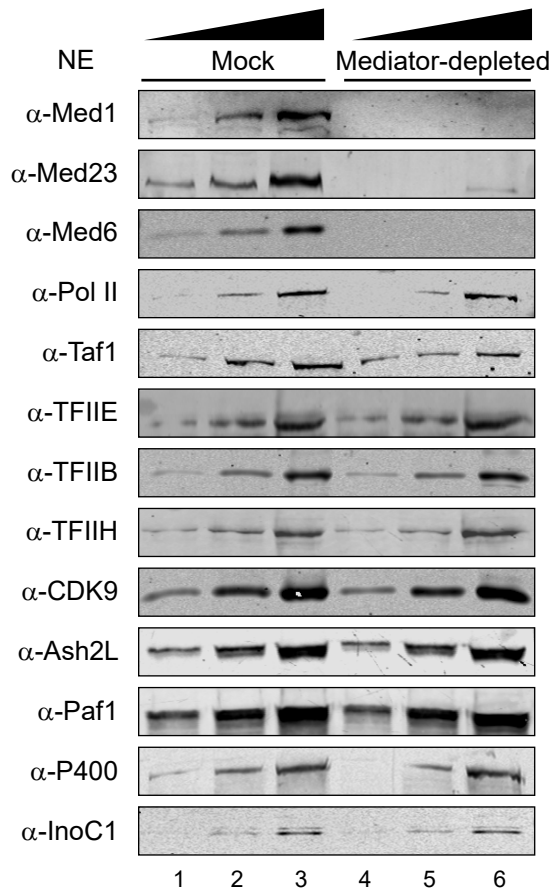

B

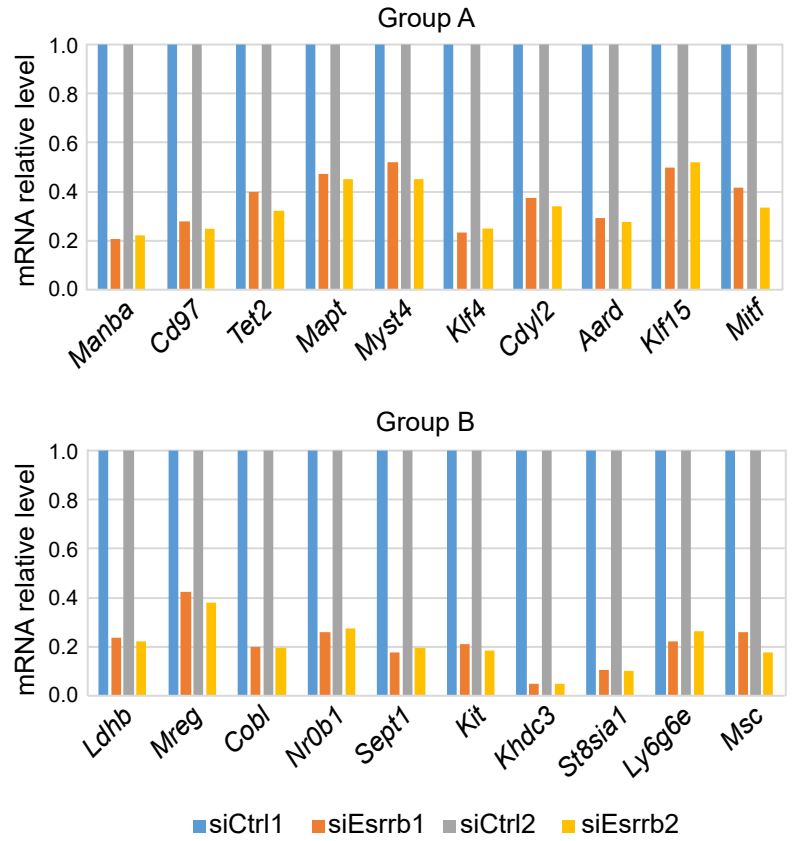

Supplement: NIHMS1511213-supplement-1.pdf [file NIHMS1511213-supplement-1.pdf]
